# Supplementary material for: Infantile Pyknocytosis: A Rare but Not So Rare Condition. A new Case Report
Source: Research Square preprint supplement (doi:10.21203/rs.3.rs-6001245/v1), 2025-05-06
Supplement: Supplementary file 1 [file 29e79425e43d75089cb0534f.docx]

**Supplementary Information**

Patient’s and partents detailed results of the erythrocytes osmotic resistance tests with acidified glycerol tests (homemade reagents), Osmored B (Eurospital) test and High Performance Liquid Chromatography (HPLC) separation method (VARIANT II β-Thalassemia Short Program BIORAD)

**Patient**: Osmored Test- Osmotic hyper resistance: A= 43% (i.r.: 70-100); Osmored Test-hypo osmotic resistance: B To=1% (i.r. <30%), B T24H =10% (i.r. <30%), AGTL50 Test at To: > 1860” (i.r.<1860), AGTL50 Test at T24H: > 1860” (i.r.< 1860).

**Father**: Osmored Test-Osmotic hyper resistance: A=100% (i.r.: 70-100); Osmored Test-hypo osmotic resistance B To=2% (i.r. <30%), B T24H =8% (i.r. <30%); AGTL50 Test at To: >1860’’ (i.r. <1860’’); AGLT50 Test at T24H: >1860’’ (i.r. <1860’’).

**Mather**: Osmored Test-Osmotic hyper resistance: A=98% (i.r.: 70-100); Osmored Test-hypo osmotic resistance B To=4% (i.r. <30%), B T24H =6% (i.r. <30%); AGTL50 Test at To: >1860’’ (i.r. <1860’’), AGLT50 Test at T24H: >1860’’(i.r. <1860’’.
